# Supplementary material for: Metabolomic analysis reveals functional overlapping of three signal transduction proteins in regulating ethanol tolerance in cyanobacterium Synechocystis sp. PCC 6803
Source: Royal Society of Chemistry journal article supplement (doi:10.1039/c4mb00651h), 2014-12-05
Supplement: c4mb00651h1.xlsx [file c4mb00651h1.xlsx]

## Sheet: Suppl Table 1
Suppl. Table 1: Primers used for mutants construction, validation and realtime RT-PCR.
Name	Sequence (5' to 3')
Cm-F2	AGCTGATAGAAACAGAAGCCACTGG
Cm-R2	TTACGCCCCGCCCTGCCACTCATCG
sll1392-F1	CGGCACCCTCCGCAATGCTT
sll1392-R1	CCAGTGGCTTCTGTTTCTATCAGCTTCAGACAGTATGTATCTTGACAAG
sll1392-F3	CGATGAGTGGCAGGGCGGGGCGTAATTTTTCATTCTTGGGCTAAAAAAA
sll1392-R3	AGGGTATGGCCCAAGCCACAGG
slr1860-F1	CCACGATTCCCCTTTCAATTG
slr1860-R1	CCAGTGGCTTCTGTTTCTATCAGCTGTCCAACAATGCGAAACCGA
slr1860-F3	CGATGAGTGGCAGGGCGGGGCGTAACGACGACATTACTATGATTGCTGT
slr1860-R3	AGGGGGATGGGTACCTAAACC
sll1712-F1	AGCGGAGATTGCTTTGGCGGT
sll1712-R1	CCAGTGGCTTCTGTTTCTATCAGCTAGAAATTTGGCATTAAAAACCCCT
sll1712-F3	CGATGAGTGGCAGGGCGGGGCGTAATTGCCACTGACCTTTGTTTGAGCG
sll1712-R3	AGTTCTGGAGCAGGTATGGTCGT
sll1423-F1	GATCCTCGGCTGCCTGCACA
sll1423-R1	CCAGTGGCTTCTGTTTCTATCAGCT GCACGTTCACGGTAATGGGGG
sll1423-F3	CGATGAGTGGCAGGGCGGGGCGTAA CCACCCTCTATGACCAGTGCCT
sll1423-R3	AGTGCGATTAGCCTGGCGCA
slr1529-F1	CTGAAAGGGACTCATGGTGC
slr1529-R1	CCAGTGGCTTCTGTTTCTATCAGCT TAGGAAAGGCGATCGGTCAT
slr1529-F3	CGATGAGTGGCAGGGCGGGGCGTAA CTGCCTCACCACAGCACCG
slr1529-R3	AGCGGCCTACCTTGATTCCTGG
ssl0707-F1	AGCCTCAGCAGCACTCAAGC
ssl0707-R1	CCAGTGGCTTCTGTTTCTATCAGCT ACCTGGTACTCCTCGTGCAATG
ssl0707-F3	CGATGAGTGGCAGGGCGGGGCGTAA CGGTGGATTCGGTGGTACGG
ssl0707-R3	TTTCTCGCGCCCCTGGACAT
sll0690-F1	TTTGGGTTCCTTCGCAGCG
sll0690-R1	CCAGTGGCTTCTGTTTCTATCAGCT CGTTCCGTTAGGATGACGAATC
sll0690-F3	CGATGAGTGGCAGGGCGGGGCGTAA AACGGATGCCTGGTCTGTCCG
sll0690-R3	TGGGTCTCTCGTAATTCCGCCCT
slr0115-F1	CGAAGCAATTACTGGCCTCAATGC
slr0115-R1	CCAGTGGCTTCTGTTTCTATCAGCT TCGAGGCATGCTCAGGGGCTA
slr0115-F3	CGATGAGTGGCAGGGCGGGGCGTAA GTTTTAGCTTAATTTCCAGCC
slr0115-R3	GATGAAAGAGGGATAAGACC
sll0794-F1	ACAGGGAGAAGCCACCACGAG
sll0794-R1	CCAGTGGCTTCTGTTTCTATCAGCT AACGCCACCTCCCACTGCATCT
sll0794-F3	CGATGAGTGGCAGGGCGGGGCGTAA GATTGCAAAGCCAGATTGCCACTG
sll0794-R3	GTTTTGGGGCCAGGGTTGGCT
sll0794-internal	AAGAGCCGCAGCCACAACC
slr1666-F1	TTTGGCATTGGGGCGGACGG
slr1666-R1	CCAGTGGCTTCTGTTTCTATCAGCT TCACCGCCTGTTGAATTTCGGCT
slr1666-F3	CGATGAGTGGCAGGGCGGGGCGTAA AACGGTGCAAACGGTGGCTGA
slr1666-R3	GGAATTTGACCCCGATTCCCTCG
slr1666-internal	CAGCCACCGTTTGCACCG
sll0792-F1	GTGACTCGAATTGTCAACACACCCG
sll0792-R1	CCAGTGGCTTCTGTTTCTATCAGCTAGAGGTTGGCGTTAGGAGCTAGGG
sll0792-F3	CGATGAGTGGCAGGGCGGGGCGTAAGGAGATGGACGATGATTCTGCGAT
sll0792-R3	TACTGTACGACCCACCGCCGC
sll1937-F1	TCAATTCCTGGGCGCTGGGTTC
sll1937-R1	CCAGTGGCTTCTGTTTCTATCAGCTGAAGACTCATGACAAGGTGGAGG
sll1937-F3	CGATGAGTGGCAGGGCGGGGCGTAAAGTGATTAGAATTGAAGTTAACC
sll1937-R3	TGGGAGAAAGGAGGGTCGGCT
sll1626-F1	GGCATTCCTGTGGTGACGGTGG
sll1626-R1	CCAGTGGCTTCTGTTTCTATCAGCTGTTCCATGTAATATCTCCTATAGG
sll1626-F3	CGATGAGTGGCAGGGCGGGGCGTAATAGCCCGGCATTACCGGGAACAGC
sll1626-R3	TGGCGCCCTCCAGGTTTTGC
sll1670-F1	CCGATGCGTTGCCGAACCCTA
sll1670-R1	CCAGTGGCTTCTGTTTCTATCAGCTCCATTGTTTCCTAAATTGCGGGC
sll1670-F3	CGATGAGTGGCAGGGCGGGGCGTAACAAAAATTAAGCCTCTCTCCAGGC
sll1670-R3	GCTGCTAACGTTGCTGACATGGT
sll1670-internal	TGGTCACCACTGGGCGGGTT
slr0724-F1	GCGGGACTGGGTCGCATTCAA
slr0724-R1	CCAGTGGCTTCTGTTTCTATCAGCTCCGCCATAGTGGTCCCTCAGCC
slr0724-F3	CGATGAGTGGCAGGGCGGGGCGTAATAGATTTGCCAATAGATAAGCC
slr0724-R3	ACTCAATGTCGCTCCATCTACCTCT
slr0395-F1	GGCCAACGCCGACCTCTACG
slr0395-R1	CCAGTGGCTTCTGTTTCTATCAGCT AGTCGCATAGGTTAGTTTTCGGGGA
slr0395-F3	CGATGAGTGGCAGGGCGGGGCGTAA GACCATTACCGCTGTGGAGCC
slr0395-R3	TGTGAAGCGGGAGTCGGGCA
slr0395-internal	CGCTCCCCTGTACCACCCCAT
sll0567-F1	CACTGCCTCGATCGCCTGACG
sll0567-R1	CCAGTGGCTTCTGTTTCTATCAGCT TTCGGCTTTGAGGGAATCGGCG
sll0567-F3	CGATGAGTGGCAGGGCGGGGCGTAA TGGGCTTGCACCCGCAGTATT
sll0567-R3	GTGCCTAGTGTGGCCGGGGT
sll1408-F1	TATCCCGGGGCTCCCTTTACGG
sll1408-R1	CCAGTGGCTTCTGTTTCTATCAGCTTTTTGCTTCGGGGTTTTATGAAATT
sll1408-F3	CGATGAGTGGCAGGGCGGGGCGTAATAGTAAGCAGTTTTTCATTCTGACA
sll1408-R3	AGCACTTCCACCTGTTGTAGGTGAG
sll1408-internal	TTGTGCTACCTGGGCCACGGAT
slr1489-F1	CGTCAGTCTCCGTCACCCCGA
slr1489-R1	CCAGTGGCTTCTGTTTCTATCAGCTAATGCCCTATGCAACGACAAACTG
slr1489-F3	CGATGAGTGGCAGGGCGGGGCGTAAAAAATTCCAATTTAGGATCAAAAT
slr1489-R3	CCCGGAGAGTTCCGCCAAATTGTT
slr1489-internal	TCAAGCCCACCTGACGAGCC
slr0741-F1	GCCAGGGCTTTTCCCCTTGGTT
slr0741-R1	CCAGTGGCTTCTGTTTCTATCAGCTGATACTAGGGGGATGGGGAAAGAA
slr0741-F3	CGATGAGTGGCAGGGCGGGGCGTAAGATAGGGTGATTAATGGGGGAGTG
slr0741-R3	GCTTCTTCGGCCACTTCCAGCA
sll0998-F1	TAGGCCCACCGGCTCTTCCA
sll0998-R1	CCAGTGGCTTCTGTTTCTATCAGCTAGATCCAGCCAAACGATGAACAAG
sll0998-F3	CGATGAGTGGCAGGGCGGGGCGTAAACAGACCAATTTAAGACAAGTTGG
sll0998-R3	ATCTTCGTCTCCAGAAGGGCATACT
sll0998-internal	GTCCTTGCCATCCCCTTGGCG
sll1286-F1	GCGCTTCCGCAAAACCATCCCT
sll1286-R1	CCAGTGGCTTCTGTTTCTATCAGCTTGGTCAACAGAAATCTTCATAATT
sll1286-F3	CGATGAGTGGCAGGGCGGGGCGTAATTCATCAACCAGTGGAAAACCTTA
sll1286-R3	GGCCTTCTTCCAGCCCGCAT
slr1871-F1	GGAATTGCCGCAGGCACACCAA
slr1871-R1	CCAGTGGCTTCTGTTTCTATCAGCTTGATATTCCTATTGTCCCTATTTT
slr1871-F3	CGATGAGTGGCAGGGCGGGGCGTAAAGACCATTACCGCAAATAAGCAAT
slr1871-R3	CAGCCCCACCTACCGTTTGCTT
slr1871-internal	GCCGATTCCAGCGGTTGGGC
slr1738-F1	GCCATTCTGAGGGAATAACACTGCC
slr1738-R1	CCAGTGGCTTCTGTTTCTATCAGCTACTGTTCCTCCTAACATCGGTGCG
slr1738-F3	CGATGAGTGGCAGGGCGGGGCGTAATTTTTGAACAATGTTCTAATTGCC
slr1738-R3	ATCGCCCCCTCTTCGTCAGCA
ssl0564-F1	CCGCCACAATCGGCAAAAGGA
ssl0564-R1	CCAGTGGCTTCTGTTTCTATCAGCTGGGTGATTATCCTCAGGTATATTT
ssl0564-F3	CGATGAGTGGCAGGGCGGGGCGTAAATTGGTATGGTGAATTGGATGGATT
ssl0564-R3	GGGCTTTGTTGGTACTGAGCATCG
slr0895-F1	TTTCCGCTTCCCCCTGTTGGC
slr0895-R1	CCAGTGGCTTCTGTTTCTATCAGCTATAATTTCGCCTCCGCAGATAATGC
slr0895-F3	CGATGAGTGGCAGGGCGGGGCGTAATTTCCCAATTTTTCATCTTTTGCCG
slr0895-R3	ATCGGTGTTCCCAATGCCCCCA
sll0594-F1	TAGATTGGCATCTCAGCGGCG
sll0594-R1	CCAGTGGCTTCTGTTTCTATCAGCTAAAATCAGGCAACCCTCAAAAATCA
sll0594-F3	CGATGAGTGGCAGGGCGGGGCGTAAGTGTGAACCGGATTGGCAAGGTTTT
sll0594-R3	ACTCCCCTGGCCATGAACCAA
sll0782-F1	GCCATTAGTGGTCTTTCGGACACTT
sll0782-R1	CCAGTGGCTTCTGTTTCTATCAGCTGAGCGGCTCAGAACACTATCAAATC
sll0782-F3	CGATGAGTGGCAGGGCGGGGCGTAAATTTATCAAGCCACCGTACAAGGAT
sll0782-R3	CCAAGCTCCTATCCTTGAGGGGGT
slr0527-F1	ACGGAGGAGGCGTCAGCGAT
slr0527-R1	CCAGTGGCTTCTGTTTCTATCAGCTTTGTTCCCTAACCCCGCCGGGGAAA
slr0527-F3	CGATGAGTGGCAGGGCGGGGCGTAAACTCCCCCTTCTTGCTGGACGGAG
slr0527-R3	GTGCCCTTAACCCCGGTGGG
slr0449-F1	TCGCCAGCTTCTGGGAACCAA
slr0449-R1	CCAGTGGCTTCTGTTTCTATCAGCTGGGATTTAGGAATTAAGAGCTTAAT
slr0449-F3	CGATGAGTGGCAGGGCGGGGCGTAAAGCGTTTACTCCTCCGTTATCAGT
slr0449-R3	CCCGCCGATGCCTATCCCCAT
slr1245-F1	ACCACTGTCGCTGAGGAGATCGTA
slr1245-R1	CCAGTGGCTTCTGTTTCTATCAGCTGCAATACCTATTCCAATCTGGCATA
slr1245-F3	CGATGAGTGGCAGGGCGGGGCGTAAAGCCCATTTATAAAGTCTTATAATG
slr1245-R3	GGCCCGGCTATTCCATCCAAGG
slr1245-internal	GCTCGCACAGCAACGGAGCTA
sll1957-F1	TGCGGGCTGGATTCACGGAAG
sll1957-R1	CCAGTGGCTTCTGTTTCTATCAGCTGACAATATAGAAAAATATGAGGATA
sll1957-F3	CGATGAGTGGCAGGGCGGGGCGTAATTGGCAGTTTGGCCATGGCATATCT
sll1957-R3	GGGTGCGAGTGTGGCGTACC
sll1594-F1	ATGAGGAAGACCACCACCGCCA
sll1594-R1	CCAGTGGCTTCTGTTTCTATCAGCTGTCCTTGACGAAGATGGTGATTTAG
sll1594-F3	CGATGAGTGGCAGGGCGGGGCGTAATCACCTTGATTGATTTTTAACAAT
sll1594-R3	CGACCAAGGCCAACCCCATGAC
sll1594-internal	CAACCGCACCCGCACATCCA
sll1872-F1	CGAAGCCGAAGCTGCCAATGC
sll1872-R1	CCAGTGGCTTCTGTTTCTATCAGCTCAGTTTGACCCTAAACTAACCATTG
sll1872-F3	CGATGAGTGGCAGGGCGGGGCGTAAGAAATTCCAGCGCCCTATTTTTGT
sll1872-R3	AATGCCGGGGCGAATGGTTTCT
sll1392-Frt	AGCCCAGTCTAACGATCCAG
sll1392-Rrt	ACCGTAGTGATGATGCCGTA
slr1860-Frt	CCCATTAGCTTGCCTGATTT
slr1860-Rrt	CGATCGCCAAATAATCATCA
sll1712-Frt	ATTGCATCATGGAAGTGGTG
sll1712-Rrt	CCTCCCGTTCCTTACGTTC
16s-Frt	CGCGTCTGATTAGCTAG
16s-Rrt	CCATTGCGGAAAATT

## Sheet: Suppl Table 2
Suppl. Table 2: Compound-specific collisional mass spectrometric parameters used in MRM.
Compounds	Abbrev	MW1	(M-H)-	FV2(V)	Product ion	Product fromula	CV3(V)
Acetyl coenzyme A	AcCOA	809.57	808	260	79	[PO3]-	130
NADPH	NADPH	833.35	744	200	79	[PO3]-	112
NADP	NADP	787.37	742	140	620	-nicotinamide	8
NADH	NADH	709.4	664	190	79	[PO3]-	108
α-Nicotinamide adenine dinucleotide	NAD	685.41	662	100	540	-nicotinamide	8
Adenosine-5’-diphosphoglucose	ADP-GCS	633.31	588	170	346	AMP	20
Uridine 5’-diphosphoglucose	UDP-GCS	610.27	565	160	323	UMP	10
Adenosine 5’-triphosphate	ATP	551.14	506	142	79	[PO3]-	92
Adenosine 5’-diphosphate	ADP	501.32	426	150	79	[PO3]-	60
Coenzyme A hydrate	COA	767.53	382.5	110	79	[PO3]-	68
Adenosine 5’-monophosphate	AMP	347.22	346	140	79	[PO3]-	45
D-Fructose 1,6-bisphosphate	FBP	406.06	339	110	97	[H2PO4]-	18
D-Ribulose 1,5-bisphosphate	RiBP	310.09	309	104	97	[H2PO4]-	14
D-Fructose 6-phosphate	F6P	304.1	259	86	97	[H2PO4]-	4
D-Glucose 6-phosphate	G6P	304.1	259	100	97	[H2PO4]-	4
D-Ribose 5-phosphate	R5P	310.1	229	78	97	[H2PO4]-	12
D-(−)-3-Phosphoglyceric acid	3PG	230.02	185	84	97	[H2PO4]-	4
Dihydroxyacetone phosphate	DHAP	180.19	169	84	97	[H2PO4]-	4
DL-Glyceraldehyde 3-phosphate	GAP	170.06	169	66	97	[H2PO4]-	8
Phospho(enol)pyruvic acid	PEP	190.02	167	82	79	[PO3]-	4
L-Glutamic acid	GLU	187.13	145	80	127	[C5H8N2O2]-	8
α-Ketoglutaric acid	AKG	226.09	145	60	101	[C4H5O3]-	6
Oxaloacetic acid	OXA	132.07	131	110	87	[C3H3O3]-	0
Sodium fumarate dibasic	FUM	160.04	115	58	71	[C3H3O2]-	0
1Molecular weight
2Fragmentation voltage at which maximal parent ion intensity is observed
3Collision cell voltage at which maximal product ion intensity is observed

## Sheet: Suppl Table 3
Suppl. Table 3. LC-MS metabolomic dataset of the mutants and the wild type grown under ethanol stress condition*.
Sample Name	3PG	AcCOA	ADP	ADP-GCS	AKG	AMP	ATP	COA	DHAP	F6P	FBP	FUM	G6P	GAP	GLU	NAD	NADH	NADP	NADPH	OXA	PEP	R5P	RiBP	UDP-Glucose
48H-sll1392C-1	156.161	1.59263	8.84244	1.65899	1295.23	79.134	13.0729	6.42031	17.5687	3.94841	15.4121	947.601	16.225	23.9227	102.824	194.6	0	36.4979	2.83688	42.2712	138.377	2.68757	6.66916	173.033
48H-sll1392C-2	118.452	1.59263	6.51985	2.6378	1613.59	82.6677	14.9641	7.05072	15.0803	5.22583	15.7273	909.278	13.3881	17.2204	77.6907	155.481	2.85347	27.6388	1.9742	35.5025	120.758	4.99357	10.8996	140.699
48H-sll1392C-3	133.964	2.02397	10.8	4.04794	1367.26	74.7709	12.7245	6.42031	19.0452	7.51524	12.6249	929.534	13.3217	21.401	104.268	186.123	3.05255	30.8407	2.98619	29.8785	114.189	4.76131	7.84704	171.59
48H-sll1392E-1	18.8738	10.1474	16.2492	5.33282	2844.1	50.3191	12.6884	6.82066	101.909	47.2097	10.5821	987.291	97.7294	19.4088	82.0485	188.237	5.7006	15.2963	4.69756	31.8799	50.1853	26.079	15.2462	120.047
48H-sll1392E-2	72.3191	8.87689	20.1444	7.72339	2709.27	55.7689	17.9711	8.7933	95.1883	48.0622	11.652	971.158	87.3312	24.2902	83.6367	225.817	9.52886	24.5744	4.731	37.965	48.4133	26.7811	12.9225	132.585
48H-sll1392E-3	110.618	16.2492	69.0759	2.55775	2855.78	88.5516	30.0076	5.2158	99.8023	79.8753	10.5152	672.32	106.64	25.7446	57.2735	231.033	7.02127	44.1838	11.9194	55.9027	52.2583	33.2507	10.8662	113.962
48H-sll1712C-1	188.87	0	58.5739	2.64293	2108.73	67.5434	37.6617	3.93136	24.6123	4.74076	18.3353	1037.27	12.4713	25.7851	65.0491	166.059	0	67.1304	3.40277	40.8993	159.17	2.57686	8.82078	146.666
48H-sll1712C-2	166.141	1.89961	8.65559	3.32018	1808.49	75.34	11.9923	5.08764	19.3925	4.3278	18.4344	983.764	10.6708	23.7203	77.9829	126.646	0	23.7698	2.46123	40.6516	114.736	4.97201	9.36588	126.563
48H-sll1712C-3	201.061	2.09783	32.3594	3.56796	1995.23	81.3362	26.611	5.46756	28.907	7.44976	18.0875	1039.25	18.2527	19.9376	81.7656	156.726	3.73314	68.1215	4.29476	48.8281	199.64	7.4002	9.86143	163.317
48H-sll1712E-1	91.9182	8.09269	32.7059	13.7391	2452.67	83.2894	24.077	4.18876	85.1827	44.6522	15.7497	878.702	78.2461	25.2163	156.76	386.07	9.16501	52.125	8.81316	36.2579	81.6641	23.189	10.7735	185.981
48H-sll1712E-2	87.2603	14.3088	25.2834	12.1307	2663.47	57.6206	29.5392	5.24433	91.315	41.385	11.0416	955.323	105.322	25.3336	144.378	356.497	8.66236	65.5625	10.7232	35.4537	76.1349	36.9951	9.18177	171.723
48H-sll1712E-3	70.6393	5.56268	7.08739	11.628	2428.01	124.775	9.44985	3.71962	87.9808	22.6863	12.4658	890.095	55.2246	26.3389	113.532	311.811	5.46215	31.2649	5.17731	32.4378	78.3466	16.0848	11.5107	162.289
48H-slr1860C-1	178.567	1.71763	12.5118	3.53631	2202.13	55.7894	23.6764	7.89775	20.2748	5.08554	12.8823	1006.4	12.2929	16.166	94.7393	192.83	0	45.6015	2.52593	37.788	206.958	7.34204	9.026	174.289
48H-slr1860C-2	131.433	0.858817	18.7087	1.01037	2236.07	48.801	30.0418	6.70214	24.1816	7.32521	18.1194	1061.53	21.1673	23.4238	93.6279	214.452	0	65.7921	1.59976	18.0183	150.411	6.24747	11.0636	174.896
48H-slr1860C-3	211.623	1.14509	7.24101	2.93008	2650.7	62.4074	15.7281	6.01172	19.7023	7.13997	21.1505	1058.47	9.98585	19.1466	79.0617	159.083	1.91971	37.7374	2.03759	42.3178	129.58	3.90678	10.0701	138.421
48H-slr1860E-1	79.2286	11.8884	32.5028	9.71937	2555.53	89.395	18.379	4.60304	100.72	56.379	13.4117	908.223	86.1662	28.3137	60.8661	242.338	10.2327	28.6779	7.03702	58.6805	49.0108	22.3032	15.4318	140.84
48H-slr1860E-2	38.4139	12.9647	27.7673	6.93767	2713.97	72.8042	17.9982	6.01044	110.125	48.9445	13.7926	977.152	83.8482	27.7673	66.7441	216.393	10.63	28.8932	7.13637	36.1123	47.2557	27.7341	14.7363	124.762
48H-slr1860E-3	41.0465	9.0405	12.9812	6.24225	2294.9	65.5685	14.3058	5.0501	87.8551	57.5877	11.6897	916.568	73.8639	23.5782	120.54	227.85	7.53375	20.3825	5.92765	23.2636	39.2417	25.3829	13.0971	138.273
48H-WTC-1	225.503	1.31661	3.40673	0.55956	1114.61	66.9662	3.32445	8.34403	18.3832	1.85971	10.8291	705.029	5.13479	22.7939	62.1441	23.3205	0	1.59639	0	17.5439	188.243	0.954544	5.00313	45.6206
48H-WTC-2	174.846	2.58385	1.92555	5.71081	2210.64	97.7749	4.55877	4.98667	19.1073	4.7398	16.0133	1029.84	10.3354	20.029	54.6065	6.66535	2.913	16.1943	2.22178	21.4937	181.742	2.45219	9.26566	76.9231
48H-WTC-3	273.872	2.73197	0	2.71551	1586.07	59.9059	9.72647	5.15125	22.9255	5.3652	19.0415	987.788	14.6967	24.3573	97.1989	172.345	3.09404	29.3769	1.23432	46.4435	269.988	1.54702	8.44278	100.227
48H-WTE-1	124.432	5.06514	5.29463	6.60599	1597.93	52.8152	22.3424	4.86844	75.2395	26.2109	17.6542	932.888	59.4048	27.6206	143.971	223.112	0	33.6857	4.3275	51.1432	135.021	10.3598	12.1957	77.5016
48H-WTE-2	144.25	8.8517	4.03244	8.04849	1822.89	62.3553	10.4745	6.40929	56.1591	39.2098	13.9168	985.326	47.5697	27.1452	110.909	201.409	7.52395	21.49	4.24554	38.1935	87.6974	20.9982	12.5563	69.4695
48H-WTE-3	49.799	3.18006	0	5.9831	2249.96	41.3243	4.99957	10.9335	64.1421	69.0925	6.9994	558.575	82.5176	15.8839	82.8782	450.798	4.81926	15.4085	2.2621	24.8831	85.2878	12.6874	17.1297	65.9124
72H-sll1392C-1	262.338	3.46365	5.76164	6.69416	1826.37	47.4919	18.3007	4.6626	44.8609	10.6907	11.0071	919.848	26.6434	23.363	111.003	177.795	3.19721	42.2965	5.31203	67.5744	208.185	11.4733	10.6574	176.846
72H-sll1392C-2	185.372	2.08152	7.19373	4.87908	1575.23	36.6014	12.1894	5.27873	61.4964	12.9887	7.64334	650.266	27.1597	13.2218	125.424	244.853	1.38213	50.9389	2.83086	46.3762	188.336	10.341	14.4541	174.981
72H-sll1392C-3	285.767	7.19373	27.0264	8.44264	2521.9	56.7006	34.4533	5.72834	47.2421	11.3401	10.0579	990.237	27.9923	18.6504	104.526	169.569	5.8449	51.7882	5.8116	49.69	250.615	17.7345	12.0062	163.258
72H-sll1392E-1	63.8482	9.71713	6.66463	5.49451	1746.74	83.486	20.5535	3.47646	113.875	44.1087	9.54755	1012.35	117.979	14.5333	143.654	297.314	11.3451	20.5874	5.29101	83.7403	44.0069	19.3834	8.15697	154.389
72H-sll1392E-2	123.05	12.2948	9.61538	7.22426	1704.98	105.142	25.658	3.64605	95.1024	53.3679	15.4491	1085.27	76.2617	17.4162	132.53	251.441	8.75051	22.0967	2.57767	68.6135	33.0179	32.5431	9.19143	148.64
72H-sll1392E-3	84.6561	10.5142	7.54647	4.54484	1717.3	78.0423	13.431	5.74888	112.977	26.5568	18.3998	1005.21	96.3743	14.6351	123.491	252.985	6.71551	19.6378	2.18763	77.1944	36.3417	22.792	10.599	157.543
72H-sll1712C-1	287.521	2.96396	31.1795	10.7795	2063.18	62.0941	33.7958	3.29513	24.3078	9.83571	11.0776	995.642	20.7312	20.9795	138.429	188.716	2.91428	71.3337	6.49091	62.326	202.874	7.58376	12.038	173.897
72H-sll1712C-2	312.524	4.40454	28.2818	10.5808	2231.63	52.0597	56.1165	3.41104	39.376	10.9782	7.28571	980.326	27.7519	22.9831	109.865	189.743	0	112.498	14.025	61.1337	231.851	7.26915	14.4555	172.456
72H-sll1712C-3	373.873	5.16623	14.9523	9.48798	1748.44	31.9412	37.4717	3.46071	52.6724	15.2006	17.0717	593.322	39.4422	17.5519	140.912	181.911	3.64286	59.7594	3.79188	75.4071	251.026	8.89188	10.0013	167.604
72H-sll1712E-1	192.931	25.5931	82.7107	17.5467	2569.12	84.776	84.2142	4.90713	71.8886	25.94	9.08727	904.861	84.5943	24.8	119.622	437.081	12.3587	168.478	23.2469	54.5567	156.549	31.9542	11.1195	161.638
72H-sll1712E-2	181.679	30.0706	92.8059	20.7025	2967.49	69.1459	108.37	1.78441	78.101	29.3436	11.4665	963.697	63.8422	20.5207	130.51	428.424	10.2108	192.733	18.125	54.0115	185.48	26.3531	9.12032	154.55
72H-sll1712E-3	201.572	35.6056	116.218	21.2973	3038.01	132.757	128.94	5.18801	85.6352	45.7668	10.9708	917.154	79.3236	15.4979	147.429	473.249	14.5066	242.548	28.3853	59.2325	182.059	37.5387	12.0117	183.315
72H-slr1860C-1	279.887	6.89532	40.1698	6.12732	2739	60.5553	45.5292	4.24071	39.3017	12.672	7.19584	1054.87	33.5417	21.2202	131.028	227.813	0	95.9001	7.3628	63.3101	225.375	10.1844	11.2696	189.78
72H-slr1860C-2	269.919	3.13879	26.7966	12.5552	2634.66	34.4098	38.7173	4.10714	72.092	21.7378	13.6237	902.085	26.663	20.4188	115.751	199.23	0	73.2941	7.17915	63.2767	256.312	8.71515	11.7371	172.55
72H-slr1860C-3	411.866	7.11237	34.8272	14.0077	2221.28	34.7103	50.2874	3.02192	77.852	19.9013	10.5183	1009.87	34.8606	31.1375	114.933	199.246	0	78.7369	8.5148	64.8795	327.152	14.3082	10.9524	186.157
72H-slr1860E-1	86.8115	9.08135	4.78866	2.172	1820.31	72.4627	18.8297	2.85609	102.409	24.7471	12.861	935.088	80.2784	28.2702	98.082	325.595	7.61055	27.1585	1.35109	71.8299	62.1841	13.8187	13.8187	162.866
72H-slr1860E-2	93.6183	13.374	25.7732	7.38821	2004.99	113.235	24.9181	4.95968	108.104	36.7187	14.4515	980.084	73.1467	27.3638	97.6202	329.237	6.02003	27.4322	4.27559	67.1096	62.7143	42.0547	6.51599	163.584
72H-slr1860E-3	118.776	11.2704	8.7222	4.54922	1989.52	87.222	26.235	2.82189	105.881	37.7962	10.7061	1055.59	99.9119	26.2179	103.845	355.062	4.92548	26.2521	1.89836	93.8748	70.6327	18.9665	9.23527	156.76
72H-WTC-1	274.689	5.70025	10.7874	9.9423	2017.13	48.0876	13.6541	4.49061	43.1165	14.4992	13.621	881.12	30.788	14.1678	139.192	142.026	4.35804	36.9688	4.67288	57.7648	256.76	5.46827	11.4834	92.0989
72H-WTC-2	268.591	4.05977	7.10875	8.96464	2149.97	45.7015	19.1224	2.61814	44.4918	13.8364	10.7874	885.677	23.7952	21.4754	122.903	128.521	0	32.7599	4.0432	56.9031	233.164	4.67288	8.3184	87.5089
72H-WTC-3	249.071	3.61237	11.6988	15.4271	1994.49	35.3615	11.6656	3.71179	39.6864	10.1246	14.2672	885.346	22.3868	18.8572	128.836	128.272	3.84436	18.8904	5.66711	55.3786	256.661	3.76151	13.2564	74.385
72H-WTE-1	200.903	4.03094	6.37681	12.5719	1999.4	68.3277	16.4046	2.54412	60.1998	17.5115	11.6963	929.412	18.1227	22.5171	154.332	209.774	1.10686	26.6306	3.88226	51.5762	167.383	9.84606	8.88789	83.9228
72H-WTE-2	234.554	4.34482	11.2998	9.77998	2098.2	81.9569	18.7505	3.03972	83.3777	15.4464	11.8285	935.673	30.8433	28.2331	169.167	235.232	1.5529	21.658	3.15537	54.0377	200.424	12.2911	12.2745	88.5981
72H-WTE-3	149.145	4.55959	7.13674	5.74904	1899.96	66.4609	18.2549	5.00563	57.0279	8.161	12.4563	938.73	25.2925	21.9058	143.264	203.331	2.64324	16.8837	3.51881	61.7857	171.249	7.92972	10.3252	82.5351
*The area of each compound obtained by LC-MS was divided by the cell numbers for normalization.

## Sheet: Suppl Table 4
Suppl. Table 4. GC-MS metabolomic dataset of the mutants and the wild type grown under ethanol stress condition*.
Sample Name	2-amino-1-phenylethanol	2-hydroxypyridine	3-hydroxypyridine	adenosine	arachidic acid	benzene-1,2,4-triol	benzoic acid	capric acid	caprylic acid	D-(+) trehalose	D-glucose-6-phosphate	D-malic acid	dioctyl phthalate	glyceric acid	glycerol	glycerol 1-phosphate	glycine	glycolic acid	heptadecanoic acid	L-(+) lactic acid	L-glutamic acid	L-pyroglutamic acid	L-serine	L-threonine	lauric acid	linoleic acid	maleic acid	Methyl Palmitate	Methyl Stearate	methyl-beta-D-galactopyranoside	myristic acid	oleic acid	palmitic acid	palmitoleic acid	phosphoric acid	phytol	porphine	pyruvic acid	spermidine	squalene	stearic acid	succinic acid	sucrose	talose	urea
48H-1392C-1	0.000992024	0.00278897	0.000323053	0.000347189	0.00140325	1.38018e-05	0.0143172	0.00195401	0.000590342	0.000277186	0.000127786	0.000117564	0.000710181	0.00152417	0.0505503	0.000906497	0.000390212	0.0585496	0.00167529	0.0425573	0.0102349	0.00582678	0.000757706	0.00251958	0.00166457	0.00359864	0.00730508	0.00502719	0.00279006	0.000667616	0.0155009	0.00207748	0.239679	0.0006454	1.03334	0.000407149	0.095803	0.00302971	0.000325383	0.000491477	0.467706	0.000736001	0.00680084	0.00439782	0.000722832
48H-1392C-2	0.000691436	0.00237626	0.000227526	0.000474962	0.000725616	3.15789e-06	0.0122748	0.000614729	0.000536676	0.000149759	4.16541e-05	0	0.000766714	0.000637323	0.0275035	0.000119834	0.000534406	0.0411842	0.00146574	0.0318006	0.0071473	0.00503939	0.000354331	0.000761082	0.000890954	0.00163521	0.00435116	0.00627493	0.00645433	0.000545639	0.00957435	0.00196958	0.159608	0.000706729	1.35299	0.000222225	0.0543729	0.0011457	0.000229203	0.000417985	0.320223	0.00134999	0.00584661	0.00255164	0.00116789
48H-1392C-3	0.000967196	0.00219767	0.00022803	0.000402278	0.00120958	3.09779e-06	0.0185507	0.0012068	0.000583661	0.000366323	0.00013465	0	0.0006246	6.14485e-06	0.0745066	0.000439283	0.000143081	0.0438849	0.00177459	0.0269639	0.0131305	0.00716733	0.000493106	0.00258745	0.00124599	0.00263573	0.00475732	0.000362355	0.000181006	0.000802195	0.0108225	0.00249425	0.127737	0.00047443	1.47775	0.000170547	0.0549706	0.0012249	0.000467906	0.00056497	0.436642	0.00155342	0.00485266	0.000142379	0.000583661
48H-1392E-1	0.00257453	0.00168058	0.000206447	0.000403523	0.00145625	1.25187e-05	0.0400928	0.000804757	0.000698178	0.000163238	8.80593e-06	0	0.000671596	2.78734e-05	0.000337773	0.000209689	0.00030102	0.122819	0.00106254	0.0472244	0.010497	0.0074199	0.00126919	0.000169049	0.000882399	0.00226275	0	0.001235	0.000413851	0.000188512	0.0112265	0.00277295	0.141063	0.00083416	1.08342	0.000340328	0.361296	4.25908e-05	0.000605245	0.000891529	0.269522	0.00062168	0.00389392	0.000127814	0.000817267
48H-1392E-2	0.00667158	0.00324288	0.000171761	0.000442262	0.00183616	9.65165e-06	0.0361198	0.00061716	0.000879213	0.000299166	0.000149357	0	0.00061537	0	0.0531176	0.0035929	0.000409555	0.0990782	0.00105541	0.0357272	0.012357	0.00749945	0.00169354	0.00022213	0.000898765	0.00140456	0.00101035	0.000302486	3.62885e-05	0.000114344	0.0119459	0.00140311	0.117947	0.000525677	1.71587	0.000253569	0.509034	0.000236756	0	0.000159181	0.23457	0.00105336	0.0044591	0.000450788	0.000879213
48H-1392E-3	0.00419678	0.00246623	0.000203204	0.000342351	0.00125974	2.80888e-05	0.0314531	0.000315763	0.000744314	0.000449006	0.000140696	0	0.000487251	7.62127e-06	0.0640404	0.000129664	0.000126024	0.100116	0.00101226	0.0358806	0.0142891	0.0090734	0.00323622	0.000237785	0.00099163	0.00243425	0.00104332	0.000202465	7.15883e-05	0.000112151	0.011367	0.00215932	0.141165	0.000588904	1.06468	0.000292545	0.614022	5.30546e-05	0.000620386	0.000354692	0.284179	0.000558713	0.00388105	0.000273345	0.00106439
48H-1712C-1	0.000121028	0.00423322	0.000441888	0.000514997	0.000727166	1.23156e-05	0.019048	0.000203411	0.000317281	0.0009132	2.56843e-05	0	0.000985244	0.000329823	0.0255681	0.000132527	0.00102214	0.0586385	0.000777417	0.0505579	0.0108074	0.00907172	0.00103897	0.000425617	0.00064028	0.00326484	0.00117473	0.00106859	0.000265268	0.000237832	0.00609693	0.00309626	0.109535	0.00167922	0.425447	0.000227913	0.936737	0	0.000137223	0.000383652	0.226364	0.000595435	0.00330836	0.00328404	0.00178256
48H-1712C-2	0.00437414	0.00260601	0.000289692	0.000279338	0.000499875	1.92527e-05	0.0261179	0.00078737	0.000273055	0.000195297	0	0.000124308	0.000513781	0.00155614	0.0354502	3.07227e-05	0.000159383	0.125009	0.00151179	0.0260049	0.0112003	0.00561952	0	7.03003e-05	0.000922085	0.00147452	0.0029913	0	5.73067e-05	0.00196973	0.0108794	0.000879252	0.124356	0.00063526	1.12787	0.000319251	0.451409	5.68701e-05	0	2.10916e-05	0.2195	0.00259187	0.00287373	0.00821888	0.00148434
48H-1712C-3	0.00452714	0.00304978	0.000306634	0.000194377	0.000706058	0	0.0462812	0.000692015	0.000271894	0.000329427	0	0.000160679	0.000545327	3.47858e-05	0.0420803	1.4737e-05	0.000375374	0.152881	0.00131543	0.0549619	0.0113585	0.00576126	0	0.00025812	0.000951248	0.00121045	0.00177425	0.000835625	0.000407762	0.000208132	0.0144285	0.00128075	0.157569	0.000552067	1.36549	0.000252533	0.532473	0	9.65042e-05	5.86204e-05	0.274449	0.00148085	0.00384981	0.000243206	0.00094908
48H-1712E-1	0.0025082	0.00246247	0.000326893	0.00126808	0.00124026	2.83509e-05	0.0125483	0.0022229	0.000586865	0.000648531	0.000395102	8.81786e-05	0.000506335	0.00115443	0.044059	0.00077376	0.00111651	0.0463954	0.00161308	0.081119	0.0273925	0.0140687	0.00138744	0.0016044	0.00103667	0.00477858	0.00797285	0.000183274	5.13923e-05	0.00152366	0.0156277	0.00228441	0.198234	0.00139216	3.24793	0.000689508	0.215399	0.000204403	0.000111891	6.6134e-05	0.349432	0.00403349	0.00525507	0.000926493	0.00270506
48H-1712E-2	0.00165897	0.00272898	0.000504798	0.00161619	0.00141985	7.97677e-05	0.0211613	0.00152203	0.000385283	0.000213623	0.000268831	0.000463995	0.000695137	0.00094402	0.0533476	0.0021383	0.00379078	0.0433704	0.00223835	0.0604252	0.0571401	0.0346921	0.0106214	0.00333095	0.00137899	0.00526762	0.00591303	0.000204141	6.84723e-05	0.000415452	0.0218817	0.00306283	0.225385	0.00116462	3.10877	0.000774549	0.230121	7.25073e-05	0.00016346	0.00028852	0.408284	0.00532003	0.00680542	0.000789698	0.0070163
48H-1712E-3	0.00239104	0.00239986	0.000305156	0.00163825	0.00127702	7.97376e-05	0.0184776	0.00135158	0.000501878	0.000513665	0.000584281	0.000236729	0.000521657	0.000744287	0.0426494	0.00189244	0.0017942	0.0385198	0.00187144	0.0611008	0.0454678	0.0187561	0.00187581	0.00172408	0.00123249	0.00634378	0.00541208	2.31812e-05	6.60921e-05	0.000569137	0.0118076	0.00295505	0.195343	0.001873	2.49489	0.000818743	0.173558	0	0.000140614	0.000350854	0.324788	0.00817005	0.00664053	0.000650761	0.00317706
48H-1860C-1	0.00575843	0.00390364	0.000263932	0.00033363	0.00132592	4.41699e-05	0.0166184	0.00102992	0.000267587	0.000114844	0.000268185	0	0.000560108	0.000134439	0.0290911	0.000194501	0.000437825	0.147272	0.000437031	0.0331222	0.00719175	0.00367402	0.000514234	0.000216519	0.000494241	0.000672663	0.00604196	0.000163865	0.000122937	0.000660009	0.00801398	0.000558564	0.101089	0.000392775	0.880593	0.000267357	0.448268	0.00026838	0.000132438	0.0419934	0.154248	0.00113819	0.00708253	0.00211017	0.000281212
48H-1860C-2	0.00168939	0.00517271	0.000232656	0.00030216	0.00148933	3.64438e-05	0.0100958	0.000541598	0.000420122	0.000140328	0.000956074	0.000222139	0.00061962	0.000145212	0.0195876	0.000669585	0.000856465	0.129285	0.000853824	0.0445866	0.00947847	0.00349979	0.00046518	0.000417536	0.00048514	0.00206871	0.00572213	0.000231043	8.29917e-05	0.000565453	0.00614093	0.00175562	0.138907	0.00269371	0.308951	0.000415405	0.102475	0.000291071	0.000362027	0.0114029	0.323161	0.000416638	0.0109533	0.000722667	6.4025e-05
48H-1860C-3	0.00551267	0.00245047	0.000228685	0.000548944	0.00272373	5.27735e-06	0.0193982	0.0011078	0.000306346	0.000193099	0.000197756	0.000284458	0.000874849	0.000150713	0.0506977	0.000256735	0.00067397	0.216655	0.000802673	0.0542388	0.0166609	0.00660519	0.000197719	0.000238741	0.000315299	0.00212624	0.00958422	0.000593619	6.42995e-05	0.00281649	0.0073816	0.0014079	0.195396	0.00173453	0.476043	0.000656318	0.158662	0.00146932	0.00014671	0.0170076	0.394823	0.000966071	0.0109843	0.00660225	0.000484181
48H-1860E-1	0.0016412	0.0022735	0.000207797	0.000393385	0.00111292	3.14093e-05	0.00378924	0.00167576	0.000383167	0.000550744	0	6.63863e-05	0.000381117	0.000851917	0.0602838	0.000577553	0.00232831	0.157633	0.00120065	0.0776034	0.0234376	0.00990965	0.00449364	0.000553646	0.000855103	0.00200891	0.00657458	9.3646e-05	7.00578e-05	0.00362768	0.0173514	0.00201706	0.189699	0.00057846	2.46024	0.00019316	0.0327697	0.00045849	0	0.0023241	0.359808	0.00640078	0.0157565	0.00110537	0.00452259
48H-1860E-2	0.000875216	0.00264846	0.000313534	0.000259104	0.00040093	8.37603e-05	0.00640968	0.00142098	0.000212838	0.000693781	5.69707e-05	5.08786e-05	0.000593028	0.00111761	0.0671208	0.00033195	0.00129782	0.0442745	0.00173765	0.0750015	0.0250096	0.0150919	0.00275932	0.00273752	0.000972612	0.00333476	0.00446291	0.000297631	0.000122755	0.00136358	0.0157714	0.0037642	0.194044	0.00110449	2.43316	0.000566371	0.0616977	9.69423e-05	7.94826e-06	0.00384266	0.319096	0.00180352	0.0135525	0.000415717	0.00376062
48H-1860E-3	0.0021583	0.0020442	0.000248778	0.000329625	0.000267517	0.000108015	0.00802947	0.00118419	0.000412197	0.00026822	0.000163534	2.43946e-05	0.000341889	0.000917717	0.0497586	0.000151545	0.00062709	0.0484418	0.00120871	0.0083145	0.0184312	0.0091357	0.000782361	0.00208422	0.000836614	0.0013981	0.00904081	4.96585e-05	0.000110898	0.00237732	0.0101863	0.00136688	0.13206	0.000479802	2.31104	0.000260071	0.127607	0.00100658	2.05345e-05	0.00283172	0.209612	0.0064055	0.00437505	0.000240336	0.000852074
48H-WTC-1	0.00124146	0.00156444	7.92255e-05	0.000333882	0.000456776	1.15461e-05	0.00175741	0.000544972	0.000284236	0.000315309	0.000258816	6.69768e-05	0.000802677	0	0.0574316	0.000688392	0.000356426	0.0323584	0.00100305	0.0232808	0.0102656	0.00495064	0.000459835	0.00221148	0.000790644	0.00211375	0.00321675	0.0022277	0.00205109	0.000204954	0.00757379	0.00246364	0.105608	0.000271045	0.868699	0.000220505	0.0212901	0	0.000129223	0.000314799	0.205412	0.00081093	0.000964777	0.000588252	0.000807778
48H-WTC-2	0.000675106	0.00119236	0.000317151	0.000257932	0.000377618	9.93057e-06	0.00239584	0.000576831	0.000268205	0.000223063	0.000384746	4.15432e-05	0.000338728	2.30163e-05	0.0569005	0.00037086	0.000166263	0.0233226	0.000880676	0.000204619	0.00743905	0.00408189	0.000889886	0.00133259	0.000583271	0.00156836	0.00120743	0.00375343	0.00345016	0.000372696	0.00648295	0.0012533	0.0863272	0.000440663	0.997878	0.000331444	0.0324061	0.00104504	0.000144931	0.000308681	0.15235	0.00075887	0.000815897	0.000470152	0.000377856
48H-WTC-3	0.00038573	0.00398594	0.000214891	0.000357413	0.000835122	7.73677e-06	0.00314403	0.00040584	0.000445277	0.000400617	0.000184806	0	0.000540799	0	0.0178186	0.000146636	0.00013409	0.0145405	0.000538278	0.0220064	0.00993122	0.004196	0.000303857	0	0.000302408	0.00316113	0.00111074	0.000482998	0.000581938	0.000312274	0.00518482	0.00227129	0.110735	0.00214584	0.436989	0.000208567	0.0225857	0.00136926	0	0.000354312	0.232964	0.000334927	0.00130599	0.00017951	0.00128465
48H-WTE-1	0.00235156	0.00230296	0.000474731	0.000929444	0.00108845	8.22982e-05	0.021926	0.00113895	0.00101067	0.00515422	0.000669481	0.00013656	0.00112559	2.7203e-05	0.0440266	0.000281075	0.00250984	0.172567	0.00166517	0.0586141	0.0242184	0.0096684	0.000285835	0	0.00120238	0.00676796	0.0565362	0.00163818	0.00160855	0.000691405	0.014533	0.0036457	0.133977	0.00110809	2.48711	0.00090291	0.231449	0.000667363	0.000488714	0.000547266	0.252614	0.00200256	0.00469573	0.000339886	0.000722775
48H-WTE-2	0.000791903	0.00132616	0.000175846	0.00175334	0.000813926	1.79944e-05	0.0195801	0.00125131	0.000670284	0.00361564	0.00287491	0.000235489	0.000857094	7.1164e-05	0.0315459	0.00234669	0.00100852	0.0303029	0.00179631	0.00565617	0.0384587	0.0116905	0.000568749	0.000245237	0.00137898	0.00543259	0.0144822	0.00277678	0.00156782	0.000369073	0.00955362	0.00322634	0.141876	0.00119778	1.77679	0.000581874	0.119551	0.00120934	0.00148529	0.000887898	0.245066	0.00129438	0.00232209	0.000296285	0.000396905
48H-WTE-3	0.00416809	0.00150222	0.000150363	0.00113371	0.00135704	2.77387e-05	0.0342836	0.002047	0.00107148	0.0031528	0.00209849	0.000231586	0.000996838	2.82273e-05	0.0217149	0.00457226	0.00173359	0.128753	0.00144798	0.0362352	0.036737	0.0117487	0.00098597	0.000205099	0.00140017	0.00211063	0.0215631	0.000343847	7.68081e-05	0.000497074	0.0124215	0.001505	0.17897	0.000626202	2.28967	0.000558913	0.129073	0.0017698	0.00205913	0.000538568	0.361891	0.00133572	0.00162237	0.000773199	0.000652157
72H-1392C-1	0.000854805	0.00566548	0	9.40156e-05	0.00175152	5.17326e-05	0.0216804	0.000649936	0.000137299	0.000124868	0	0	0.000590209	0	0.00954505	2.08885e-05	0.000855835	0.0416003	0.00102679	0.0685614	0.0170713	0.00567178	0.000119703	0.00109525	0.000749347	0.00146623	0.00879417	0.000134466	2.45714e-05	0.000244127	0.00785625	0.00251341	0.140413	0.00181398	0.123782	0.000258838	0.154842	0.00177276	0	0.000319374	0.280432	0.00566005	0.020938	0.00044857	0.00360471
72H-1392C-2	0.00149942	0.00202004	0	0.000165388	0.00171422	2.47598e-05	0.0334339	0.000703094	0.000138481	0.000381512	9.31202e-05	0.00029376	0.000390662	0	0.0584548	5.53285e-05	0.000527138	0.0382206	0.00149114	0.0315813	0.0276115	0.0157148	0.000749518	0.00111539	0.000704277	0.00223475	0.00403183	0.000171187	3.18231e-05	0.000482382	0.0119236	0.00204401	0.1634	0.00159218	0.0997197	0.000250922	0.161558	0.00131686	0	0.000410917	0.27671	0.00529202	0.0215903	0.000632003	0.00253629
72H-1392C-3	0.000870129	0.00224075	0.000355215	0.000129538	0.000390495	0.000102934	0.0369827	0.000596778	0.000136117	0.000487976	0	5.38534e-05	0.000521674	0.000593236	0.0413283	8.97685e-05	0.000774941	0.0356709	0.00135807	0.0514688	0.0297737	0.0194883	0.000434611	0.0010751	0.00072429	0.00263316	0	0.000171227	1.73198e-05	0.000557617	0.00954759	0.00298282	0.159747	0.0015771	0.147844	0.000358433	0.148126	0.00086096	0	0.00050246	0.241215	0.00514951	0.0209159	0.000540287	0.00467313
72H-1392E-1	0.000204654	0.00298016	0	0.00108024	0.00110765	1.80053e-05	0.0661023	0.000411172	0	0.00115657	0.000743318	0.00076776	0.000612278	0	0.019756	0.00164039	0.000222492	0.0302103	0.000939056	0.0283056	0.0294676	0.0233446	6.29085e-05	0.000583977	0.000434939	0.00459347	0.00689995	0.00091021	0.000243431	0.000410209	0.00878185	0.0034864	0.146947	0.00205421	0.0629428	0.000267327	0.0949188	0.000817628	0	0.00127325	0.284404	0.000160251	0.0630289	0.000661017	0.000320433
72H-1392E-2	0.0014781	0.0018239	0.000558532	0.00136038	0.000755946	1.80471e-05	0.055786	0.00052684	8.8156e-05	0.00130107	0.000870345	0.000938571	0.000492401	0.00051326	0.0450167	0.00128515	0.000452599	0.0295992	0.0013057	0.057013	0.0444252	0.0336413	0.000139567	0.000390707	0.000722473	0.00313906	0.0073621	0.000338715	8.78801e-05	0.00036561	0.0110468	0.00330968	0.158974	0.00265114	0.0705601	0.00052866	0.128978	0.00127036	0	0.000724223	0.2907	0.00473495	0.0443366	0.000684808	0.000239699
72H-1392E-3	0.00124462	0.00240203	0.000126434	0.00102702	0.000563117	1.55542e-05	0.0421154	0.000972442	0	0.00144556	0.000761959	0	0.000596777	0	0.0109565	0.000929918	1.75632e-05	0.0308214	0.000936143	0.0497362	0.0198767	0.028493	0.00011945	0.000197437	0.00039052	0.00484379	0.00196458	0.000444037	4.45503e-05	0.000514376	0.00655465	0.0045299	0.151537	0.00324807	0.0364015	0.00038376	0.0429505	0.001044	0	0.00188347	0.303084	0.00421451	0.065444	0.00106096	0.000158965
72H-1712C-1	0.000845085	0.00174921	0.000186706	0.000258988	0.000526668	1.9453e-05	0.0136239	0.000855735	0.000192732	0.00026564	5.57371e-05	6.57729e-05	0.000415743	0.000359161	0.00995848	0.000443034	0.000266111	0.0325389	0.000932241	0.0243808	0.0156253	0.00781007	8.38081e-05	0.00129713	0.000585511	0.00302128	0.00550428	0.000147569	3.98663e-05	0.000175013	0.00935245	0.0019335	0.155304	0.00119368	0.141145	0.000272199	0.0913841	0.00152307	0	0.000376371	0.288303	0.00370281	0.00508777	0.000359226	0.00071733
72H-1712C-2	0.000768589	0.00918271	0.000198532	0.000309048	0.000605981	0	0.0117492	0.00128413	0.000210265	0.000496208	0	0	0.00113925	0.000180165	0.00861711	0.000306213	0.000268499	0.0174569	0.000858981	0.0417752	0.00425983	0.00278805	9.24396e-05	0.000333579	0.000114011	0.00438811	0.00335537	0.000295981	7.10504e-05	0.000530937	0.00555527	0.00181814	0.156183	0.00238193	0.137736	0.000441893	0.0322911	0.000890761	0	0.000603663	0.337463	0.00335537	0.00853808	0.000524094	0.00026338
72H-1712C-3	0.000289467	0.00657015	0.000178079	0.000245058	0.000587617	3.30661e-05	0.0162362	0.000311889	0.000205319	0.000302105	9.13037e-05	0	0.000830464	0.000269663	0.012864	0.000169391	0.000504956	0.0306068	0.000931737	0.0494639	0.00702636	0.00434631	7.51766e-05	0.000815353	0.000459799	0.00396683	0.00561745	0.000215497	7.96707e-05	0.000490043	0.00715363	0.00159247	0.165729	0.00340196	0.125015	0.000364427	0.0377403	0.00155307	0	0.000830955	0.348399	0.00440243	0.00683259	0.000179745	0.000341852
72H-1712E-1	0.000601503	0.00116168	0.000154529	0.00227773	0.00106034	0	0.0346824	0.000218987	0.000169591	0.000608261	0.00074131	0.000435498	0.000511638	0.000443887	0.0193093	0.00452672	0.000711506	0.0226687	0.00119845	0.0267941	0.041389	0.027286	0.000540582	0.00132363	0.00064991	0.00570908	0.00765867	0.000325692	7.68679e-05	0.0131904	0.0120645	0.00321138	0.165048	0.00141616	0.0746652	0.000542784	0.0383697	0.000283206	7.39126e-06	0.000488385	0.299554	0.00429693	0.025565	0.00122741	0.000257146
72H-1712E-2	0.000291824	0.00136723	0.000127254	0.00396079	0.00121295	2.03793e-05	0.0464857	0.00047958	0.000160767	0.000459513	0.000956472	0.000534461	0.000568012	0.000357505	0.0224177	0.00616196	0.00112513	0.0273808	0.00137478	0.03087	0.063959	0.0422897	0.000633763	0.00159048	0.000773579	0.00794184	0.00780472	0.000754906	6.04837e-05	0.000927684	0.0139692	0.00444296	0.205533	0.00201244	0.096462	0.000743396	0.0690297	0.000267775	1.45094e-05	0.000758913	0.390565	0.00462698	0.0329329	0.000713972	0.000174139
72H-1712E-3	0.000824246	0.00574163	0.000221042	0.0027443	0.00159389	7.2848e-05	0.0455161	0.000349283	0.000177704	0.000533887	0.0011643	0.000611013	0.00214097	0	0.0222674	0.00293645	0.00434701	0.0250248	0.00144495	0.0403154	0.0382165	0.0191259	0.000417579	0.000827615	0.000419835	0.00926043	0.0101021	0.000506834	8.69744e-05	0.000839614	0.0117111	0.00424519	0.21767	0.00458042	0.0660103	0.000750592	0.0815854	0.000298637	4.53769e-05	0.000907232	0.469807	0.00519099	0.0448613	0.00106365	0.000340153
72H-1860C-1	0.000409149	0.00237468	0.000307255	0.000284567	0.000470608	0.000182406	0.00660226	0.000977995	9.01905e-05	0.000510793	0.00015646	0	0.000643965	0.000624189	0.0286581	0.0012208	0.000267949	0.0357563	0.00114073	0.0111011	0.0366452	0.0245007	0.00135673	0.00170737	0.00052814	0.00314528	0	0.000385297	7.8781e-05	0.000247196	0.00751819	0.00212117	0.13584	0.00199075	0.516233	0.000521062	0.0697022	0.00127407	5.30636e-05	0.000595815	0.195999	0.00520006	0.0120477	0.000719032	0.00111805
72H-1860C-2	0.00051163	0.00230014	0.000253675	0.000255769	0.00121531	7.11575e-05	0.0132682	0.00121738	9.40327e-05	0.000435739	1.27061e-05	0	0.000536674	0.000607936	0.0193304	0.00101298	0.000427492	0.0398963	0.00163618	0.053166	0.0188288	0.0110167	0.000912321	0.00196324	0.000867299	0.00578655	0.00824402	0.000234029	0.000118273	0.000368869	0.0141437	0.00381191	0.280332	0.00221116	0.199578	0.000445528	0.0964696	0.00216525	4.40261e-05	0.00104314	0.528185	0.00476376	0.0174411	0.000410957	0.00137265
72H-1860C-3	0.00061411	0.00526411	0.000280465	0.000131323	0.000344408	9.31286e-05	0.00430169	0.000781774	9.21116e-05	0.000585848	1.20246e-05	0	0.000965446	0.000616062	0.0239943	0.00176972	0.000132206	0.0324018	0.000717971	0.0269639	0.027737	0.0177587	0.00113452	0.0018353	0.00018898	0.00322391	0.00423079	0.000511133	9.1698e-05	0.00041328	0.00386666	0.00135106	0.140694	0.00341025	0.357905	0.000466374	0.0237094	0.0023149	6.21011e-05	0.00149308	0.299819	0.00559189	0.0251459	0.000240915	0.00124535
72H-1860E-1	0.000325861	0.00195361	0.000104448	0.0010932	0.00164296	0	0.0242883	0.000544779	0	0.000232601	0.000298801	0.000607265	0.000483571	0.000164846	0.0547545	0.000770011	0.00662861	0.0166079	0.00145094	0.05951	0.0230469	0.0051041	0.00353758	0.001139	0.000817886	0.00310551	0.00478126	0.00218809	0.00227754	0.000267457	0.0104388	0.00406723	0.18035	0.00104829	0.510711	0.000307468	0.0292787	0.000202167	8.34705e-06	0.00130789	0.366476	0.00100313	0.0583586	0.000440761	0.00291927
72H-1860E-2	0.000849366	0.0051899	0.000162095	0.0011214	0.00111372	0	0.0317686	0.000304229	0	0.00122471	0.000287112	0	0.00105381	0.000157847	0.0122319	0.000582419	0.00764466	0.00881778	0.0016907	0.0721729	0.013079	0.00759902	0.000315225	0	0.000545394	0.00610121	0.00795086	0.000754264	0.000176804	0.000489521	0.00804385	0.00447878	0.200356	0.00154301	0.110357	0.000465042	0.0132552	0.000229912	0	0.00126454	0.432593	0.00198752	0.0627066	0.000198423	0.000551914
72H-1860E-3	0.000667296	0.00635172	0.000219742	0.001065	0.00128279	0	0.059172	0.000359353	0	0.00133625	0.000776437	0	0.0016645	0.000144346	0.00971919	0.000938215	0.00641377	0.0474388	0.00173144	0.0493845	0.0135255	0.00260919	0.000218962	0	0.000272903	0.00632727	0.0114152	0.000350738	1.64386e-05	0.000436041	0.00921612	0.00423191	0.191876	0.00113478	0.104122	0.000354695	0.0142639	0.000194421	0	0.0016948	0.468982	0.00310599	0.0540106	0.000683099	0.000679444
72H-WTC-1	0.00254203	0.0027592	0.000265133	0.000311203	0.00151736	0.000129947	0.0228991	0.00127483	0.000198091	0.00176298	3.33797e-05	0.000137229	0.000554873	0.000885382	0.135732	0.000476113	0.000597546	0.0545009	0.00125269	0.0473985	0.0351489	0.0187634	0.00117205	0.00213499	0.000918226	0.00422814	0.0175364	0.000132089	1.47853e-05	0.000451154	0.0153474	0.00386019	0.190773	0.00162555	0.217347	0.000535323	0.143846	0.0042435	0	0.000607174	0.30919	0.00755749	0.00687176	0.00127394	0.00198423
72H-WTC-2	0.002504	0.00419258	0.000147684	0.000156386	0.0012337	3.70441e-05	0.0138732	0.00180502	0.000189711	0.00164769	0	0	0.000465549	0.000834659	0.00639966	0.000359347	0.000583759	0.0325113	0.000986935	0.0517952	0.0229801	0.015013	0.00057455	0.00181403	0.000241154	0.00327653	0.0136167	0.000138974	3.76253e-05	0.00051341	0.00718354	0.00195679	0.147912	0.0018871	0.157418	0.000250074	0.0853068	0.00613018	3.93205e-05	0.000526366	0.290282	0.00800267	0.00709822	0.000801061	0.00273259
72H-WTC-3	0.002465	0.00191097	0.000185807	0.000233794	0.0012409	5.59071e-05	0.0268504	0.000942448	0.000181331	0.00102694	2.09443e-05	2.92737e-05	0.000496594	0.000783936	0.0292924	0.000242582	0.000569971	0.0439111	0.000970968	0.0636363	0.0205256	0.0112625	0.00097932	0.00149308	0.000706112	0.0033168	0.0096971	9.91705e-05	2.65011e-05	0.00073897	0.013833	0.002929	0.137551	0.00137686	0.351866	0.000348443	0.152796	0.005187	0	0.000687981	0.21299	0.00686351	0.00490448	0.000661537	0.00348095
72H-WTE-1	0.00026219	0.0082958	0.000124092	0.00125771	0.000658549	3.23891e-06	0.0184868	0.0010532	1.88121e-05	0.00768417	0.000509451	0	0.00157017	0	0.02889	0.000378145	0.000283858	0.0118235	0.00127532	0.0320359	0.00979013	0.00424591	0.000405357	0.000370357	0.000226338	0.00459004	0.00655194	0.00024343	5.1697e-05	0.00048897	0.00622117	0.00319362	0.149291	0.00125989	0.108225	0.000354611	0.221398	0.000451967	6.07318e-05	0.000529871	0.315074	0.00394701	0.0175331	0.000598974	0.00066639
72H-WTE-2	0.000495046	0.00769747	0.000187281	0.00177256	0.000615205	3.29917e-05	0.00993281	0.000983708	4.99592e-05	0.00883275	0.000664908	0	0.00272106	0	0.0414052	0.000231194	0	0.00582806	0.00105394	0.0336636	0.00515904	0.00481975	0.000101878	0.000303252	0.000404723	0.00529449	0.00212881	0.000193965	1.63291e-05	0.000379116	0.0067289	0.00324225	0.153401	0.00283621	0.123925	0.000320809	0.26192	0.000439886	4.39699e-05	0.000755694	0.341348	0.00420165	0.0199549	0.000279124	0.000316515
72H-WTE-3	0.000415249	0.00336626	0.000313621	0.000944663	0.000927859	9.78857e-06	0.0131486	0.00189853	7.74452e-05	0.00804077	0.000639462	0.00038502	0.0019692	0	0.0208001	0.000305113	0.000325871	0.0766868	0.00105478	0.052715	0.0225257	0.014743	0.000708836	0.00126483	0.000577817	0.00282949	0.0055031	0.000149714	6.28092e-05	0.000381951	0.0156706	0.00252828	0.12396	0.000816365	0.0836139	0.000410787	0.137462	0.000161483	7.89937e-05	0.00157909	0.218937	0.00528028	0.0129095	0.000193233	0.000907156
*10 μl D-Sorbitol (100 μg/ml, Aldrich Chemical) was added into each sample before derivatization as an internal standard. The area of each compound was divided by that of D-Sorbitol and the cell numbers for normalization. The values here indicate the relative concentrations of each compound compared with 100 μg/ml of D-Sorbitol and normalized by the cell numbers.
