# Supplementary material for: Metabolomic analysis reveals functional overlapping of three signal transduction proteins in regulating ethanol tolerance in cyanobacterium Synechocystis sp. PCC 6803
Source: Royal Society of Chemistry journal article supplement (doi:10.1039/c4mb00651h), 2014-12-05
Supplement: c4mb00651h2.pdf [file c4mb00651h2.pdf]

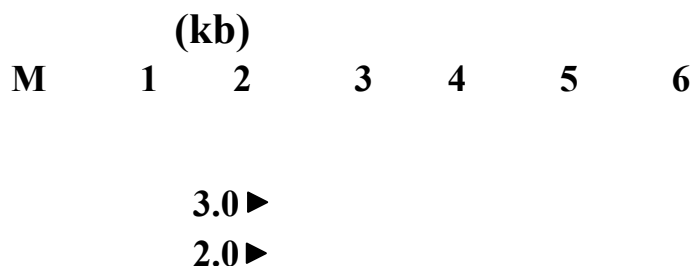

**Suppl. Fig. 1:** Segregation of  $\Delta sll1392$ ,  $\Delta sll1712$  and  $\Delta slr1860$  determined by PCR analysis.

Primers F1 and R3 (**Suppl. Table 1**) were used. Lane M: 1 kb DNA markers. Lane 1 and 2: sll1392-F1 and sll1392-R3 were used as primers and the chromosomal DNA of  $\Delta sll1392$  (Lane 1) or wild type (Lane 2) was used as PCR template. Lane 3 and 4: sll1712-F1 and sll1712-R3 were used as primers and the chromosomal DNA of  $\Delta sll1712$  (Lane 3) or wild type (Lane 4) was used as PCR template. Lane 5 and 6: slr1860-F1 and slr1860-R3 were used as primers and the chromosomal DNA of  $\Delta slr1860$  (Lane 5) or wild type (Lane 6) was used as PCR template.

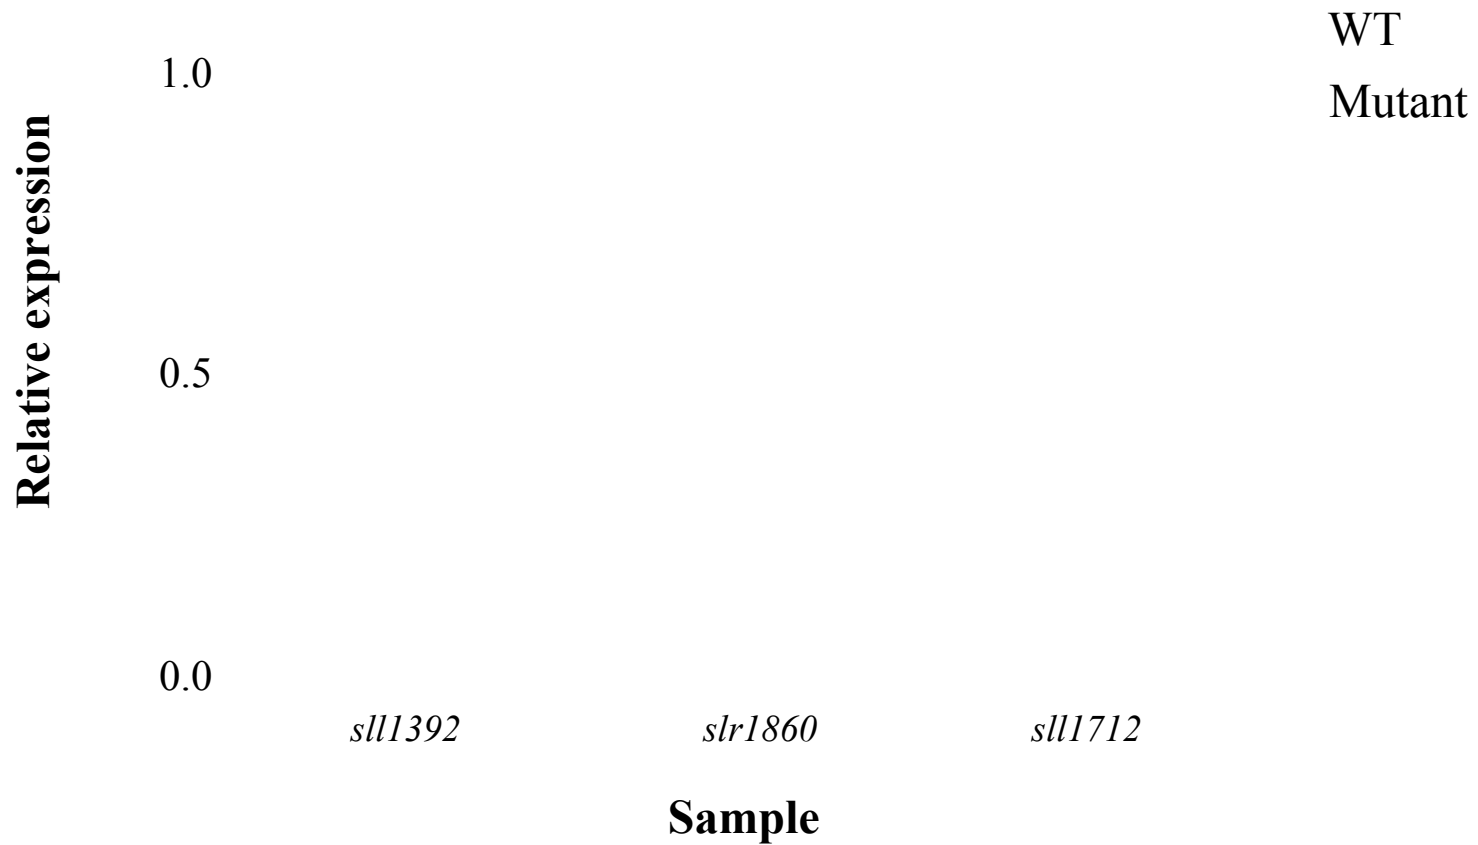

**Suppl. Fig. 2:** Relative expression of *sll1392*, *slr1860* and *sll1712* in its corresponding mutant and the wild type determined by real-time RT-PCR.
